# Supplementary material
Source: Research Square preprint supplement (doi:10.21203/rs.3.rs-8901869/v1)
Supplement: Supplementary file 1 [file 05d8d30f2c64b58965c34566.docx]

**Supplementary-Methods**

**Cell Cycle Analysis**

The cell cycle status was determined using the R package Tricycle (version 0.4.0) [1]. Cell cycle phase values were assigned on a scale from 0 to 2π, with the ranges 0.5π-π, π-1.75π, and 1.75π-2π corresponding to the S, G2/M, and G1/G0 phases, respectively [2]. The start of the G2 phase and the midpoint of the M phase were represented by π and 1.5π, respectively [1]. Based on these definitions, the cell cycle phase value ranges of 1.75π-2.5π (0.5π), 0.5π-π, π-1.25π, and 1.25π-1.75π correspond to G1, S, G2, and M phase cells, respectively.

**Measurement of Cell Proliferation Capacity**

Cell Counting Kit-8 (U22-001A, Biosharp Co., Ltd., Shanghai, China) were used to perform CCK-8 assay following the manufacturers’ instructions. The proliferative capacity was assessed via the CCK-8 assay. Cells from three sorted cell populations (G1 phase NP cells, G2/M phase NP cells, and macrophages) were seeded in a 96-well plate at a density of 5 × 103 per well, with 10 wells for each cell type. After incubating for 4 hours, the absorbance (450 nm) was measured using multi-detection plate readers (SpectraMax iD3, Molecular Devices, San Jose, California, USA).

**Osteogenic and adipogenic induction**

Osteogenic and adipogenic differentiation induction was conducted to evaluate the stemness capacity. For osteogenic differentiation, G1 phase NP cells and G2/M phase NP cells were respectively seeded at a density of 2 × 105 per well in a 24-well plate with Osteogenic Induction Medium (HUXXC-90021, OriCellTM, Cyagen Biosciences Co., Ltd., Guangzhou, Guangdong, China), with each five wells for cell type. The medium was changed every three days. After a 3-week induction, cells were washed with PBS, fixed in 4% PFA for 30 min, and then stained by Alizarin Red S (ALIR-10001, OriCellTM, Cyagen Biosciences Co., Ltd., Guangzhou, Guangdong, China) following the manufacturers’ instructions. For adipogenic differentiation, cells from the three types were seeded at a density of 2 × 105 per well in a 24-well plate with Adipogenic Induction Medium (HUXXC-90031, OriCellTM, Cyagen Biosciences Co., Ltd., Guangzhou, Guangdong, China), with five wells for each cell type. After a 3-week induction, cells were washed with PBS, fixed in 4% PFA for 30 min, and then stained by Oli Red O solution (OLIR-10001, OriCellTM, Cyagen Biosciences Co., Ltd., Guangzhou, Guangdong, China) following the manufacturers’ instructions. All the cells were observed by microscopic inspection (IX51, Olympus, Tokyo, Japan). The percentages of stained area were quantitated by Image J (v2.14.0).

**Quantitative Polymerase Chain Reaction (qPCR) Assay**

The mRNA levels of osteogenic genes (*ALP* and *OC*) and adipogenic genes (*APP* and *LPL*) was detected via qPCR to assess the differentiation outcomes of G1 phase NP cells and G2/M phase NP cells. Total RNA extraction was performed using the RNA Extraction Kit for Cell-lysis (FZ007, BEUJING D-Nano Therapeutics Co., Ltd., Beijing, China) according to the manufacturer's instructions. Isolated RNA was treated with Nuclease-free water (BL510A, Biosharp Co., Ltd., Hefei, Anhui, China) before being reverse transcribed into cDNA. The RNA was reverse transcribed using the Evo M-mLVRT Mix Kit Ver.2 (AG11728, Accurate Biotechnology Co., Ltd., Changsha, Hunan, China), which was then subjected to RT-qPCR using SYBR Green Premix Pro TagHS qPCR kit (AG11718, Accurate Biotechnology Co., Ltd., Changsha, Hunan, China) and ABI Q5 real-time PCR System (A28574, Thermo Fisher, Waltham, Massachusetts, America). The primers were synthesized by Sangon Biotech (Sangon Biotech (Shanghai) Co., Ltd., Shanghai, China). Osteogenic and adipogenic specific genes and primers for qPCR were shown in (**Table S1**). β-actin was used to normalize the experiments. All RT-qPCR data were analyzed using the Applied Biosystems Comparative CT Method (∆∆CT) and expressed as 2−∆∆CT. Each sample was assessed three times for each gene.

**Statistical Analysis**

The absorbance, precentage of stained area and gene expression level was reported as mean ± SD (standard deviation). The histological data were qualitatively described. Representative images were shown. Quantifiable data comparing the G1 phase NP cells, G2M phase NP cells and macrophages were analyzed using one-way ANOVA. All of the data analysed were performed using Prism (v10.2.3, GraphPad Software, San Diego, California, USA). P<0.05 was regarded as statistically significant.

**Tissue H&E Staining and Immunostaining**

Some NP samples (**S10-S18**) were embedded in paraffin for serial sectioning and staining. Sections were stained with H&E (RC0062, RecordBio Co., Ltd., Wuhan, Hubei, China)。Histological degeneration degree was evaluated by the H&E histological scores[3]. The endogenous peroxidase activity on the sections was blocked using 3% H2O2 solution followed by blocking with 3% BSA (A8020, Solarbio Science & Technology Co., Ltd., Beijing, China). Primary antibody targeting *p16* (1:50; Anti-p16 ARC Recombinant Rabbit Monoclonal Antibody [SR34-02], Cat. ET1602-9, Huabio Biotechnology Co., Ltd., Hangzhou, Zhejiang, China) was added to the sections, which were incubated at 4°C overnight. Then, HRP-conjugated secondary antibodies (K212141D, Tong Ling Biotech Co., Ltd., Shanghai, China) were applied to the corresponding primary antibody. Afterward, we stained the samples with diaminobenzidine (DAB Chromogen Kit, RC062, RecordBio Co., Ltd., Wuhan, Hubei, China) and hematoxylin for nuclei staining.

The stained sections were scanned using the Olympus VS200 slide scanner (VS200, Olympus Corp., Tokyo, Japan), and the staining intensity of *p16* was evaluated using QuPath software (version 0.4.3, University of Edinburgh, Edinburgh, UK).

**Reference:**

[1] Zheng SC, Stein-O’Brien G, Augustin JJ, Slosberg J, Carosso GA, Winer B, et al. Universal prediction of cell-cycle position using transfer learning. Genome Biol 2022;23:41. https://doi.org/10.1186/s13059-021-02581-y.

[2] Erbe R, Stein-O’Brien G, Fertig EJ. Transcriptomic forecasting with neural ordinary differential equations. Patterns (N Y) 2023;4:100793. https://doi.org/10.1016/j.patter.2023.100793.

[3] Le Maitre CL, Dahia CL, Giers M, Illien-Junger S, Cicione C, Samartzis D, et al. Development of a standardized histopathology scoring system for human intervertebral disc degeneration: an Orthopaedic Research Society Spine Section Initiative. JOR Spine 2021;4:e1167. https://doi.org/10.1002/jsp2.1167.

**Supplementary-Table**

**Table S1. List of primers used for qPCR**

| Gene | Species | Sense (5′-3′) | Antisense (5′-3′) |
| --- | --- | --- | --- |
| *β-actin* | Human | GTGGGGCGCCCCAGGCACCA | CTTCCTTAATGTCACGCACGATTTC |
| *ALP* | Human | TGGAGCTTCAGAAGCTCAACACCA | ATCTCGTTGTCTGAGTACCAGTCC |
| *OC* | Human | ATGAGAGCCCTCACACTCCTC | GCCGTAGAAGCGCCGATAGGC |
| *APP* | Human | CTGTCCAAGTCCAACAGCAA | ACGTTGGCAGCTTTACGTCT |
| *LPL* | Human | TCCGCGTGATTGCAGAGAGAG | TGCTGCTTCTTTTGGCTCTGACT |
