# Supplementary material
Source: Research Square preprint supplement (doi:10.21203/rs.3.rs-8901869/v1)
Supplement: Supplementary file 2 [file 764671e32cfe63ddebc1b161.docx]

**Supplementary-Figure legends**

**Figure S1. The *p16* expression levels in NP samples from previous data.** (A-C) The *p16* expression levels in NP samples from GSE15227 (A), GSE23130 (B) and GSE70362 (C) across different Pfirrmann grades. NP, nucleus pulposus.

**Figure S2. The *p16* expression levels in NP samples S1-S6.** (A) The *p16* expression levels among NP samples S1-S6. (B) The *p16* expression levels among different *p16* groups. NP, nucleus pulposus.

**Figure S3. Schematic of workflow.** (A) The scRNA-seq workflow of primary and first-passage cells. (B) The flow cytometry workflow of first-passage cells. ScRNA-seq, single cell RNA sequencing.

**Figure S4. The *p16* expression levels in ProNPC.** (A) The *p16* expression levels of ProNPC across different *p16* groups. ProNPC, progenitor nucleus pulposus cells.

**Figure S5. The *E2F1* expression levels in ProNPC.** (A) The *E2F1* expression levels of ProNPC in primary and first-passage cells. ProNPC, progenitor nucleus pulposus cells.
